# Supplementary material
Source: MDPI journal article supplement (https://www.mdpi.com/2072-4292/12/7/1218)
Supplement: s1 [file s1]

## Sheet: Manuscript_information
Drill-core mineral abundance estimation using hyperspectral and high-resolution mineralogical data
Journal: Remote Sensing
Tuşa L.1, Khodadadzadeh M.1, Contreras C.1, Rafiezadeh Shahi K.1, Fuchs M.1, Gloaguen R.1, Gutzmer J.1
Helmholtz-Zentrum Dresden-Rossendorf, Helmholtz Institute Freiberg for Resource Technology, Chemnitzer Straße 40, 09599 Freiberg, Germany;
Compilation of numerical results

## Sheet: MineralAbudanceMapping-RMSE
	Method	Sample ID	Train & Validation data	Overall RMSE	RMSE per class
					White mica	Biotite	Chlorite	Amphibole	Carbonate	Gypsum	Feldspar	Quartz	Sulphide	Other
	Random Forest	DC-1	50-50 % random sel	0.0735279	0.0597286	0.0593658	0.0595146	0.0554487		0.0563197	0.0498473	0.0777321	0.0622477	0.0520901
			Train a - Test - c	0.0961459	0.0801784		0.0572489	0.0113268		0.0641464	0.182102	0.128533	0.0325622
			Train b - Test - c	0.115219	0.147959		0.0527696	0.0080676		0.0470165	0.23757	0.0925551	0.0311249
			Train a+b - Test c	0.0822846	0.0918265	0.041471	0.0527055	0.00782629		0.0405656	0.180973	0.112184	0.030534	0.00540098
		DC-2	50-50 % random sel	0.07	0.09	0.04	0.04	0.02		0.07	0.11	0.11	0.05	0.01
			Train a - Test - b	0.109269	0.120746	0.0763288	0.0600445	0.0302996		0.141839	0.148228	0.16579	0.0316696
			Train b - Test - a	0.13533	0.143322	0.0581541	0.0478934	0.0291871		0.129752	0.168467	0.266319	0.0574247
		DC-3	50-50 % random sel	0.0809007	0.109429	0.00408874	0.0429622	0.0094833		0.0913428	0.108742	0.102964	0.118455	0.00511106
			Train a - Test - b	0.139824	0.15178		0.0398145	0.0132505		0.169277	0.0980528	0.180565	0.202915
			Train b - Test - a	0.114705	0.150992		0.0586095	0.016708		0.084232	0.168206	0.105158	0.138338
		DC-4	50-50 % random sel	0.122549	0.100762				0.0281435	0.113802	0.0467212	0.200906	0.153133
			Train a - Test - b	0.241743	0.167699					0.24816	0.054584	0.341596	0.287786
			Train b - Test - a	0.161242	0.146361					0.123056	0.068127	0.248739	0.164057
		DC-5	50-50 % random sel	0.0703159	0.091894	0.0048695	0.0260004	0.00970937	0.0686395	0.106437	0.0982792	0.118477	0.017096	0.00816274
			Train a - Test - b	0.106706	0.10114		0.0270413	0.014302	0.163097	0.153365	0.122348	0.121247	0.0114778
			Train b - Test - a	0.130517	0.12441		0.0364149	0.0115498	0.0735417	0.206161	0.159597	0.214252		0.00720995
	Support Vector Machines	DC-1	50-50 % random sel	0.101373	0.116786	0.0278757	0.0477513	0.014395		0.12184	0.210769	0.120105	0.0376368	0.0167795
			Train a - Test - c	0.101257	0.0958675		0.0588038	0.024855		0.0639529	0.197082	0.116769	0.0437742
			Train b - Test - c	0.093527	0.111124		0.0590677	0.0197969		0.0438541	0.179362	0.0981747	0.0354714
			Train a+b - Test c	0.0924349	0.0949435	0.0467488	0.0553534	0.0275248		0.0693626	0.211203	0.0946793	0.0456586	0.0337142
		DC-2	50-50 % random sel	0.09	0.12	0.06	0.05	0.03		0.1	0.15	0.16	0.05	0.01
			Train a - Test - b	0.183631	0.121941	0.128877	0.0734377	0.0562081		0.155847	0.219185	0.394669	0.0352678
			Train b - Test - a	0.14475	0.160609	0.0816667	0.0380327	0.0298448		0.1085	0.207791	0.2701	0.0693307
		DC-3	50-50 % random sel	0.107444	0.145972	0.0128075	0.049478	0.0185305		0.12485	0.149783	0.133285	0.153267	0.0119249
			Train a - Test - b	0.144952	0.157352		0.0369339	0.0185515		0.187537	0.18461	0.168389	0.151498
			Train b - Test - a	0.141408	0.162907		0.0751172	0.0351557		0.0867824	0.238591	0.130471	0.15814
		DC-4	50-50 % random sel	0.201329	0.200491				0.0306486	0.217006	0.07763	0.295835	0.245521
			Train a - Test - b	0.286879	0.178672					0.327428	0.0721371	0.418582	0.303109
			Train b - Test - a	0.20014	0.193032					0.174354	0.0958827	0.290036	0.198125
		DC-5	50-50 % random sel	0.100234	0.119928	0.00945983	0.0316091	0.0141264	0.125641	0.159562	0.146177	0.146426	0.0205088	0.0136377
			Train a - Test - b	0.125221	0.120249			0.0264236	0.0195024	0.191509	0.16773	0.148291	0.151462	0.01238
			Train b - Test - a	0.131323	0.135211		0.0432353	0.0174539	0.0931194	0.194589	0.166884	0.204018		0.0163949
	Feed-Forward Artificial Neural Network	DC-1	50-50 % random sel	0.0821088	0.0606481	0.0635567	0.068262	0.0627294		0.0639019	0.0662423	0.0855772	0.0701927	0.0678526
			Train a - Test - c	0.170629	0.122825		0.0671016	0.022686		0.137838	0.276416	0.273596	0.0551887
			Train b - Test - c	0.124812	0.115753		0.0680235	0.0231282		0.0636479	0.249879	0.144646	0.0388086
			Train a+b - Test c	0.0993976	0.100809	0.0485426	0.0587721	0.0132361		0.052563	0.204928	0.160359	0.0357529	0.00840649
		DC-2	50-50 % random sel	0.08	0.1	0.05	0.05	0.02		0.08	0.12	0.13	0.05	0.01
			Train a - Test - b	0.104296	0.0989576	0.0733891	0.0627038	0.0330355		0.135372	0.12864	0.171733	0.0364178
			Train b - Test - a	0.193431	0.22765	0.0885378	0.0677627	0.0761694		0.20066	0.239295	0.324126	0.082484
		DC-3	50-50 % random sel	0.0868142	0.118962	0.00542892	0.0460649	0.0128931		0.0955367	0.115988	0.115967	0.122863	0.00578577
			Train a - Test - b	0.174033	0.1736		0.0440692	0.0277754		0.194268	0.105909	0.211146	0.288883
			Train b - Test - a	0.140472	0.156474		0.0765028	0.0327539		0.0968457	0.191358	0.198026	0.13366
		DC-4	50-50 % random sel	0.140064	0.118785				0.0305284	0.11607	0.0550227	0.226887	0.18538
			Train a - Test - b	0.244274	0.190311					0.243634	0.0635841	0.350361	0.273282
			Train b - Test - a	0.19121	0.192554					0.143793	0.101113	0.275378	0.192098
		DC-5	50-50 % random sel	0.0772334	0.101025	0.00649405	0.0311097	0.0138971	0.0730062	0.111065	0.10961	0.133879	0.0196723	0.0107709
			Train a - Test - b	0.107542	0.10664		0.0328185	0.0180563	0.127495	0.162104	0.123406	0.142708	0.0137128
			Train b - Test - a	0.145507	0.149497		0.0580168	0.0325029	0.0827427	0.218769	0.182027	0.221315		0.020762

## Sheet: ModalMineralogy-summary
	Method	Sample ID	Train & Validation data	Modal mineralogy (Area %)
				White mica	Biotite	Chlorite	Amphibole	Carbonate	Gypsum	Feldspar	Quartz	Sulphide	Other
	Ground truth	DC-1	50-50 % random sel	0.160413	0.0112938	0.0433891	0.01759		0.073185	0.422996	0.248942	0.0175407	0.00465036
			Train a - Test - c	0.102769		0.0464192	0.0221791		0.049601	0.546136	0.213908	0.0165184
			Train b - Test - c	0.102769		0.0464192	0.0221791		0.049601	0.546136	0.213908	0.0165184
			Train a+b - Test c	0.10144	0.0205185	0.0452255	0.0214857		0.0485061	0.531318	0.208871	0.0161632	0.0040027
		DC-2	50-50 % random sel	0.115376	0.10542	0.0368898	0.0506953		0.0686845	0.329566	0.259491	0.029091	0.00478662
			Train a - Test - b	0.073373	0.14084	0.040395	0.0599143		0.0949923	0.377133	0.183915	0.021501
			Train b - Test - a	0.167054	0.064461	0.0365323	0.0377213		0.0350367	0.269943	0.350421	0.0388304
		DC-3	50-50 % random sel	0.257114	0.00406439	0.0465549	0.0215568		0.109549	0.233761	0.238974	0.0843373	0.00408834
			Train a - Test - b	0.297582		0.0292057	0.0111904		0.142782	0.147428	0.257619	0.114193
			Train b - Test - a	0.222717		0.06604	0.0315038		0.0687899	0.316909	0.221893	0.0606536
		DC-4	50-50 % random sel	0.200259				0.00723044	0.0835178	0.0501839	0.465905	0.192904
			Train a - Test - b	0.192211					0.140887	0.0448484	0.370463	0.25159
			Train b - Test - a	0.218725					0.0395465	0.0596853	0.534126	0.147917
		DC-5	50-50 % random sel	0.222622	0.00693877	0.0408195	0.0184663	0.085694	0.162701	0.299769	0.145639	0.00776306	0.00958738
			Train a - Test - b	0.214457		0.0343503	0.0199115	0.120748	0.216271	0.280022	0.0980315	0.0053165
			Train b - Test - a	0.227284		0.0475419	0.0165006	0.0536256	0.129525	0.316709	0.20141		0.00740392
	Random Forest	DC-1	50-50 % random sel	0.157906	0.0105958	0.0426406	0.0172622		0.0735435	0.422273	0.251054	0.0198456	0.00487867
			Train a - Test - c	0.097338		0.0371748	0.0145448		0.0835388	0.451564	0.292759	0.0230803
			Train b - Test - c	0.20478		0.0408898	0.0180541		0.0571742	0.411279	0.252688	0.0151351
			Train a+b - Test c	0.137568	0.00990411	0.0388699	0.0167735		0.0526489	0.450443	0.275009	0.0142603	0.00452313
		DC-2	50-50 % random sel	0.116395	0.105908	0.0394218	0.0491315		0.0716841	0.324242	0.258871	0.0292595	0.00508657
			Train a - Test - b	0.146986	0.0861278	0.0274413	0.0513142		0.0302781	0.340455	0.288671	0.0287272
			Train b - Test - a	0.127503	0.0938435	0.0627726	0.0298174		0.142633	0.300292	0.203688	0.03945
		DC-3	50-50 % random sel	0.258092	0.00431852	0.0476699	0.0211737		0.105717	0.230563	0.237522	0.09098	0.00396361
			Train a - Test - b	0.246288		0.0434749	0.0206223		0.0909661	0.164652	0.23708	0.196916
			Train b - Test - a	0.297902		0.0504293	0.0211909		0.0998093	0.261653	0.224772	0.0442443
		DC-4	50-50 % random sel	0.203429				0.00706762	0.0869257	0.0524756	0.446047	0.204055
			Train a - Test - b	0.131764					0.0638901	0.0432905	0.529611	0.231445
			Train b - Test - a	0.265881					0.0672601	0.0770428	0.433939	0.155877
		DC-5	50-50 % random sel	0.217257	0.00674524	0.0395303	0.017994	0.0891173	0.176392	0.292356	0.143689	0.00701573	0.00990348
			Train a - Test - b	0.208862		0.0397306	0.0144728	0.101693	0.226895	0.27898	0.126248	0.0031182
			Train b - Test - a	0.221379		0.0359078	0.0203713	0.0576589	0.277668	0.289738	0.0907123		0.0065656
	Support Vector Machines	DC-1	50-50 % random sel	0.142381	0.0118201	0.0384026	0.0184305		0.0777711	0.443413	0.243791	0.0181509	0.00584
			Train a - Test - c	0.10675		0.0410261	0.0205729		0.0165455	0.491502	0.291632	0.0319716
			Train b - Test - c	0.177866		0.0220897	0.00421738		0.0401586	0.486632	0.268068	0.000968962
			Train a+b - Test c	0.120673	0.0295006	0.0491889	0.0361825		0.0214518	0.43912	0.239877	0.0386522	0.0253532
		DC-2	50-50 % random sel	0.105969	0.103233	0.0298186	0.0473155		0.0627643	0.335695	0.290968	0.0238523	0.000383245
			Train a - Test - b	0.10493	0.0307958	3.06311e-06	0.0153514		0.0095591	0.253837	0.566898	0.0186249
			Train b - Test - a	0.0903053	0.123939	0.0236771	0.038464		0.127117	0.387026	0.207256	0.00221574
		DC-3	50-50 % random sel	0.247125	0.00390699	0.043041	0.0206492		0.109422	0.232083	0.235432	0.104391	0.00394998
			Train a - Test - b	0.276768		0.0271814	0.00313348		0.0599025	0.284501	0.245293	0.103221
			Train b - Test - a	0.306462		0.0212327	0.000263879		0.12726	0.177504	0.247329	0.119948
		DC-4	50-50 % random sel	0.172188				0.00519667	0.14441	0.0317373	0.427975	0.218494
			Train a - Test - b	0.146216					0.00865293	0.0115415	0.659549	0.174041
			Train b - Test - a	0.184184					0.167263	0.00970376	0.414279	0.22457
		DC-5	50-50 % random sel	0.220308	0.00122507	0.0351915	0.0129198	0.0929606	0.184527	0.300837	0.14503	0.00219548	0.00480621
			Train a - Test - b	0.228941		0.036363	0.00622794	0.0600061	0.157109	0.307497	0.203856	0
			Train b - Test - a	0.224895		0.0277262	0.0152098	0.0902372	0.237621	0.299792	0.0983973		0.00612136
	Feed-Forward Artificial Neural Network	DC-1	50-50 % random sel	0.157881	0.011053	0.042623	0.0174806		0.0727849	0.426385	0.247911	0.0190491	0.00483158
			Train a - Test - c	0.0429481		0.0295692	0.0166406		0.100611	0.394783	0.385074	0.0303736
			Train b - Test - c	0.0894597		0.0350552	0.020084		0.0268737	0.591884	0.219628	0.0170152
			Train a+b - Test c	0.0699325	0.0169062	0.0276103	0.0171411		0.0328403	0.553892	0.256605	0.0191422	0.00593014
		DC-2	50-50 % random sel	0.116106	0.106531	0.0383441	0.0505608		0.0678492	0.327192	0.259038	0.0292983	0.00508102
			Train a - Test - b	0.106392	0.095462	0.0224253	0.0577109		0.0312248	0.393955	0.263718	0.0291122
			Train b - Test - a	0.179517	0.0728337	0.0436448	0.0562865		0.150453	0.266744	0.194492	0.0360292
		DC-3	50-50 % random sel	0.260496	0.00419463	0.0470943	0.0218846		0.104768	0.233197	0.23571	0.0885757	0.00408044
			Train a - Test - b	0.263069		0.0329944	0.0253018		0.0732171	0.160874	0.208153	0.236391
			Train b - Test - a	0.237649		0.0622169	0.0279781		0.0606533	0.244368	0.315497	0.0516383
		DC-4	50-50 % random sel	0.20252				0.0063821	0.0875454	0.052766	0.448579	0.202208
			Train a - Test - b	0.10327					0.0665659	0.038422	0.455543	0.336199
			Train b - Test - a	0.229757					0.0761436	0.0806085	0.481111	0.13238
		DC-5	50-50 % random sel	0.216801	0.00692763	0.0395932	0.018779	0.0876472	0.175541	0.296093	0.142214	0.00671921	0.00968548
			Train a - Test - b	0.208879		0.0371104	0.0157002	0.12683	0.187965	0.26963	0.148612	0.00527289
			Train b - Test - a	0.216842		0.0451212	0.027656	0.0441414	0.260363	0.305592	0.0899794		0.0103052

## Sheet: MineralAssociationMapping-RMSE
	Method	Sample ID	Train & Validation data	Overall RMSE	RMSE per class
					White mica	Biotite	Chlorite	Amphibole	Carbonate	Gypsum	Feldspar	Quartz	Other
	Random Forest	DC-1	50-50 % random sel	0.051478	0.0473342	0.00336453	0.0126256	0.00210937		0.0229233	0.126361	0.0478572	0.00109467
			Train a - Test - c	0.0562658	0.0488093		0.0416222	0.0101633		0.0508707	0.0491411	0.0988652
			Train b - Test - c	0.0252539	0.0448799		0.0332014	0.00412988		0.0117794	0.0143964	0.0186271
			Train a+b - Test c	0.0245177	0.0106199	0.00629757	0.0358564	0.0053993		0.00434811	0.00749303	0.0571162	0.00208766
		DC-2	50-50 % random sel	0.0663085	0.0562597	0.0416527	0.0089641	0.0263138		0.041368	0.135614	0.0969492	3.98239e-05
			Train a - Test - b	0.0876324	0.030405	0.0331555	0.0438674	0.0171517		0.169817	0.079401	0.119882
			Train b - Test - a	0.127281	0.0889844	0.0558632	0.0308112	0.00755578		0.126478	0.129951	0.261675
		DC-3	50-50 % random sel	0.12111	0.11591	0.00335023	0.0118189	0.0159842		0.252311	0.18358	0.0783348	2.06224e-06
			Train a - Test - b	0.0896726	0.0785045		0.00373412	0.0131404		0.166984	0.111467	0.0398613
			Train b - Test - a	0.102805	0.140691		0.0015351	0.00518705		0.154087	0.102897	0.0962239
		DC-4	50-50 % random sel	0.122217	0.1458				0.00227155	0.0449231	0.0255199	0.213971
			Train a - Test - b	0.0754765	0.00923741				0.11864		0.0183589	0.091044
			Train b - Test - a	0.0430661	0.0471114				0.011519		0.0115984	0.0702287
		DC-5	50-50 % random sel	0.0279095	0.0569306	0.000362076	0.000840706	0.00198716	0.0354154	0.0457358	0.00525232	0.0197528	0.000884193
			Train a - Test - b	0.0467974	0.039506		0.00714388	0.00673997	0.0111921	0.0994803	0.0114273	0.059335
			Train b - Test - a
	Support Vector Machines	DC-1	50-50 % random sel	0.0617869	0.064673	0.00504705	0.0169814	0.00363877		0.0204257	0.149724	0.0565415	0.000212258
			Train a - Test - c	0.0487629	0.0495174		0.0179141	0.0160995		0.0659683	0.0573646	0.0599358
			Train b - Test - c	0.0354257	0.0474959		0.0478749	0.0121677		0.0143583	0.0202064	0.0471114
			Train a+b - Test c	0.0336192	0.0461408	0.0292059	0.014413	0.0275047		0.0573329	0.0278499	0.0012067	0.0321195
		DC-2	50-50 % random sel	0.0672843	0.0689037	0.0391944	0.0194109	0.0246177		0.0516801	0.147706	0.0666244	0.00489879
			Train a - Test - b	0.169615	0.0326007	0.0815905	0.0751353	0.0150135		0.194104	0.0111528	0.387291
			Train b - Test - a	0.160004	0.149605	0.107603	0.00584469	0.0326494		0.0729525	0.226444	0.295888
		DC-3	50-50 % random sel	0.121319	0.108891	0.00292076	0.0075996	0.0159675		0.249941	0.192452	0.0778488	4.15673e-05
			Train a - Test - b	0.17933	0.103153		0.0147653	0.00227267		0.294017	0.29635	0.0884485
			Train b - Test - a	0.114795	0.186744		0.0164676	0.0104694		0.171639	0.0904266	0.0785943
		DC-4	50-50 % random sel	0.118081	0.178945				0.000108121	0.0312251	0.0502796	0.197891
			Train a - Test - b	0.10068	0.0760096				0.164362		0.000299301	0.0880526
			Train b - Test - a	0.156137	0.111216				0.155119		0.0199931	0.246342
		DC-5	50-50 % random sel	0.030721	0.0553589	0.00690174	0.00620345	0.00407428	0.0402339	0.0549018	0.00305293	0.0256502	0.00514474
			Train a - Test - b	0.179152	0.182202		0.0322833	0.0218039	0.0979457	0.307003	0.283672	0.0750898
			Train b - Test - a
	Feed-Forward Artificial Neural Network	DC-1	50-50 % random sel	0.0533563	0.0477047	0.00389283	0.0127503	0.00236147		0.0238886	0.130732	0.0515114	0.00113083
			Train a - Test - c	0.173211	0.127755		0.0510145	0.00686449		0.149534	0.244657	0.280757
			Train b - Test - c	0.0696043	0.0690587		0.0382921	0.000960836		0.0403423	0.145586	0.00306793
			Train a+b - Test c	0.0539262	0.0862975	0.00174268	0.0487897	0.00508601		0.0182885	0.0567996	0.0992298	0.000689676
		DC-2	50-50 % random sel	0.0672475	0.0562487	0.0420267	0.0100148	0.0276862		0.0452866	0.138106	0.0962112	5.79031e-05
			Train a - Test - b	0.0897471	0.00964888	0.0389252	0.0455223	0.0154519		0.160583	0.0746716	0.145258
			Train b - Test - a	0.129193	0.0417832	0.0386711	0.00917255	0.039675		0.143082	0.0974729	0.286291
		DC-3	50-50 % random sel	0.122408	0.117422	0.0032393	0.0111505	0.0167278		0.25381	0.186218	0.0810537	0.000105038
			Train a - Test - b	0.0747475	0.0701256		0.00840509	0.0293281		0.133692	0.0817188	0.0558854
			Train b - Test - a	0.0913803	0.112098		0.00745592	0.00808687		0.181736	0.0652846	0.0111897
		DC-4	50-50 % random sel	0.121116	0.177276				0.000919808	0.0310826	0.0506498	0.195924
			Train a - Test - b	0.0462681	0.0156304				0.0793125		0.0323139	0.0313681
			Train b - Test - a	0.0748681	0.0755437				0.0132378		0.0349747	0.123756
		DC-5	50-50 % random sel	0.0274421	0.0577025	0.000169071	0.000823611	0.0029103	0.0331534	0.0439447	0.00114082	0.0201725	0.00057713
			Train a - Test - b	0.0547393	0.0180202		0.00499784	0.00579803	0.0368949	0.104036	0.0348744	0.0847959
			Train b - Test - a

## Sheet: MineralAssociation-summary
	Method	Sample ID	Train & Validation data	Modal mineralogy (Area %)
				White mica	Biotite	Chlorite	Amphibole	Carbonate	Gypsum	Feldspar	Quartz	Other
	Ground truth	DC-1	50-50 % random sel	0.20976	0.00731424	0.0563154	0.015448		0.0986991	0.301446	0.304942	0.00607519
			Train a - Test - c	0.170978		0.0752624	0.0222822		0.072551	0.416568	0.242358
			Train b - Test - c	0.170978		0.0752624	0.0222822		0.072551	0.416568	0.242358
			Train a+b - Test c	0.170602	0.0142256	0.0742158	0.0216306		0.0714716	0.403004	0.238272	0.00657815
		DC-2	50-50 % random sel	0.178127	0.0660409	0.0500626	0.0236212		0.116193	0.194945	0.365706	0.0053047
			Train a - Test - b	0.139503	0.112976	0.0751384	0.0306601		0.203848	0.247485	0.190389
			Train b - Test - a	0.234294	0.0294932	0.0411046	0.0177151		0.0418868	0.154555	0.480951
		DC-3	50-50 % random sel	0.16662	0.00133106	0.0403166	0.00691616		0.373322	0.0656598	0.341473	0.00436131
			Train a - Test - b	0.165819		0.0449472	0.00431099		0.389508	0.0494206	0.345994
			Train b - Test - a	0.169144		0.0392778	0.010487		0.326356	0.0953681	0.359367
		DC-4	50-50 % random sel	0.0738056				0.00892281	0.139418	0.0149918	0.762862
			Train a - Test - b	0.0591396					0.173255	0.00817837	0.759427
			Train b - Test - a	0.0951198					0.0491217	0.0287282	0.82703
		DC-5	50-50 % random sel	0.314619	0.00834236	0.0475938	0.0192735	0.0689239	0.162085	0.35092	0.0282422	0.0107883
			Train a - Test - b	0.182202		0.0322833	0.0218039	0.0979457	0.307003	0.283672	0.0750898
			Train b - Test - a
	Random Forest	DC-1	50-50 % random sel	0.162426	0.0106788	0.0436898	0.0175574		0.0757758	0.427808	0.257085	0.00498052
			Train a - Test - c	0.122169		0.0336401	0.0121188		0.123422	0.367427	0.341223
			Train b - Test - c	0.215858		0.042061	0.0181523		0.0607716	0.402172	0.260985
			Train a+b - Test c	0.159982	0.00792803	0.0383593	0.0162313		0.0671235	0.410497	0.295388	0.00449049
		DC-2	50-50 % random sel	0.121867	0.107694	0.0410985	0.049935		0.0748248	0.330559	0.268757	0.00526487
			Train a - Test - b	0.169908	0.0798204	0.031271	0.0478118		0.0340314	0.326886	0.310271
			Train b - Test - a	0.14531	0.0853564	0.0719158	0.0252709		0.168365	0.284506	0.219276
		DC-3	50-50 % random sel	0.28253	0.00468129	0.0521354	0.0229004		0.121011	0.24924	0.263139	0.00436337
			Train a - Test - b	0.244324		0.0486813	0.0174514		0.222523	0.160887	0.306133
			Train b - Test - a	0.309835		0.0408129	0.015674		0.172269	0.198266	0.263143
		DC-4	50-50 % random sel	0.25275				0.00881468	0.108193	0.0652713	0.564971
			Train a - Test - b	0.068377					0.0546153	0.0265373	0.850471
			Train b - Test - a	0.142231					0.0606407	0.0403265	0.756802
		DC-5	50-50 % random sel	0.257689	0.00798029	0.0467531	0.0212607	0.104339	0.207821	0.345667	0.00848935	0.0116725
			Train a - Test - b	0.221708		0.0394272	0.0150639	0.0867537	0.207523	0.295099	0.134425
			Train b - Test - a
	Support Vector Machines	DC-1	50-50 % random sel	0.145087	0.0123613	0.039334	0.0190868		0.0782734	0.45117	0.2484	0.00628745
			Train a - Test - c	0.121461		0.0573482	0.0383817		0.00658271	0.473933	0.302294
			Train b - Test - c	0.218474		0.0273874	0.0101145		0.0581927	0.396362	0.289469
			Train a+b - Test c	0.124461	0.0434315	0.0598028	0.0491353		0.0141387	0.430854	0.239479	0.0386977
		DC-2	50-50 % random sel	0.109223	0.105235	0.0306517	0.0482389		0.0645127	0.342651	0.299082	0.000405912
			Train a - Test - b	0.106903	0.0313854	3.07233e-06	0.0156466		0.00974425	0.258638	0.57768
			Train b - Test - a	0.0846893	0.137096	0.0469493	0.0503645		0.114839	0.380999	0.185063
		DC-3	50-50 % random sel	0.275511	0.00425182	0.0479162	0.0228837		0.123381	0.258112	0.263625	0.00431974
			Train a - Test - b	0.268973		0.030182	0.00203832		0.0954907	0.345771	0.257546
			Train b - Test - a	0.355888		0.0228102	1.7634e-05		0.154717	0.185795	0.280773
		DC-4	50-50 % random sel	0.219606				0.00665126	0.184341	0.0405116	0.548891
			Train a - Test - b	0.135149					0.00889363	0.00847767	0.84748
			Train b - Test - a	0.206336					0.204241	0.00873511	0.580688
		DC-5	50-50 % random sel	0.25926	0.00144063	0.0413903	0.0151992	0.109158	0.216987	0.353973	0.00259198	0.00564359
			Train a - Test - b
			Train b - Test - a
	Feed-Forward Artificial Neural Network	DC-1	50-50 % random sel	0.162055	0.0112071	0.0435651	0.0178094		0.0748105	0.432178	0.25343	0.00494436
			Train a - Test - c	0.0432233		0.0242479	0.0154177		0.222085	0.171911	0.523115
			Train b - Test - c	0.10192		0.0369703	0.0213214		0.0322087	0.562154	0.245426
			Train a+b - Test c	0.0843047	0.0159683	0.025426	0.0165446		0.0531831	0.459803	0.337502	0.00726783
		DC-2	50-50 % random sel	0.121878	0.108068	0.0400478	0.0513074		0.0709062	0.333051	0.269495	0.00524679
			Train a - Test - b	0.149152	0.0740507	0.0296161	0.046112		0.0432654	0.322156	0.335647
			Train b - Test - a	0.192511	0.0681643	0.0502772	0.05739		0.184969	0.252028	0.19466
		DC-3	50-50 % random sel	0.284042	0.00457036	0.051467	0.0236439		0.119512	0.251878	0.26042	0.00446635
			Train a - Test - b	0.235945		0.0533523	0.0336391		0.255815	0.131139	0.290109
			Train b - Test - a	0.281242		0.0467337	0.0185739		0.14462	0.160653	0.348177
		DC-4	50-50 % random sel	0.251082				0.008003	0.108335	0.0656416	0.566939
			Train a - Test - b	0.07477					0.0939427	0.0404923	0.790795
			Train b - Test - a	0.170663					0.0623595	0.0637029	0.703274
		DC-5	50-50 % random sel	0.256917	0.00817329	0.0467702	0.0221838	0.102077	0.20603	0.349779	0.00806967	0.0113655
			Train a - Test - b	0.200223		0.0372811	0.0160058	0.134841	0.202966	0.248798	0.159886
			Train b - Test - a
